# Supplementary material
Source: publisher figshare collection journal article supplement (https://karger.figshare.com/articles/dataset/_/12588188)
Supplement: Supplementary file 1 [file 2]

# BỘ NÃO CỦA TRẺ

## NHU CẦU DINH DƯỠNG VÔ TẬN

Não bộ là cơ quan có thời gian phát triển và trưởng thành lâu nhất - bắt đầu từ tuần thứ ba của thai kỳ và tiếp tục trong suốt độ tuổi trưởng thành

### Giấc ngủ

Giấc ngủ đóng vai trò quan trọng đối với sự phát triển nhận thức & tâm lý xã hội lành mạnh trong quá trình chuyển đổi từ giai đoạn sơ sinh sang giai đoạn thơ ấu.

#### Giấc ngủ bao gồm ba trạng thái:

Không chuyển động mắt nhanh (NREM) - nghỉ ngơi và phục hồi với hoạt động não thấp

Chuyển động mắt nhanh (REM) - tăng cường trí nhớ, xuất hiện các giấc mơ và xây dựng các kết nối trong hệ thần kinh trung ương

Tỉnh thức

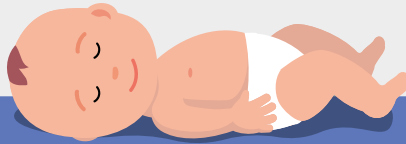

#### Các mốc thời gian của giấc ngủ

| 0-3 tháng                                                | 2-3 tháng                         | 4-12 tháng        | 12-18 tháng               | 18 tháng - 4 tuổi                    |
|----------------------------------------------------------|-----------------------------------|-------------------|---------------------------|--------------------------------------|
| thường đảo lộn ngày/đêm, không có nhịp sinh học ngày/đêm | Các quãng đều đặn giữa ngủ & thức | Ngủ đêm nhiều hơn | ngủ hai giấc vào ban ngày | một giấc hoặc không có giấc ngủ ngày |

#### Các yếu tố quan trọng đối với giấc ngủ của trẻ sơ sinh

- Đi ngủ đúng giờ và đều đặn
- Chỗ ngủ an toàn và thoải mái
- Đặt bé vào cũi lúc bé buồn ngủ nhưng vẫn còn thức
- Hạn chế thời gian dùng các thiết bị điện tử
- Vận động phù hợp & tiếp xúc với ánh sáng tự nhiên

#### Lợi ích của việc ngủ ngon:

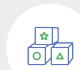

Học tập & trí nhớ

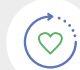

Điều chỉnh cảm xúc

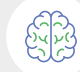

Phát triển nhận thức

### Dinh dưỡng

Dinh dưỡng tối ưu trong giai đoạn thai nhi và vài năm đầu đời là trung tâm cho sự phát triển của một cấu trúc não khỏe mạnh cần thiết cho hoạt động nhận thức suốt đời

#### Ngày nay sắt được coi là dưỡng chất thiết yếu khi bàn về:

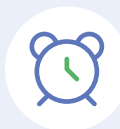

Thời gian

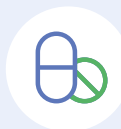

Liều dùng

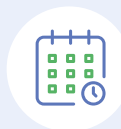

Khoảng thời gian bị thiếu sắt

Khi thai nhi bị thiếu sắt trong một khoảng thời gian dài, não bộ sẽ không phát triển bình thường

#### Sáu dưỡng chất thường gắn liền với quá trình phát triển nhận thức giai đoạn đầu

Những dưỡng chất này rất quan trọng từ trước khi thụ thai cho đến khi mang thai và sau khi sinh:

Trước khi thụ thai Thai nghén Sau khi sinh

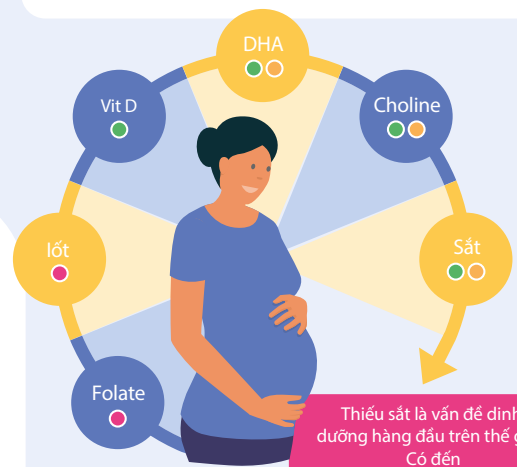

Thiếu sắt là vấn đề dinh dưỡng hàng đầu trên thế giới. Có đến

50%

phụ nữ trên toàn thế giới bị thiếu sắt

### Năng lượng

Não bộ tiêu thụ một phần lớn năng lượng của cơ thể, đặc biệt là trong những giai đoạn tăng trưởng nhanh

Bộ não đang phát triển của trẻ sử dụng tới 60% nhu cầu năng lượng của cơ thể

#### Thể tích bộ não của trẻ sơ sinh so với của người lớn:

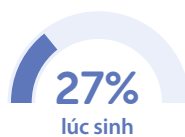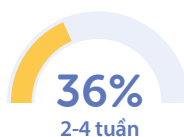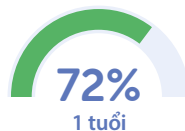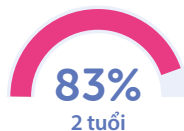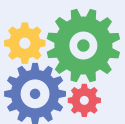

Não người lớn sử dụng năng lượng từ glucose

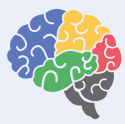

Bộ não đang phát triển cần glucose và axit béo để tạo ra năng lượng

NNI

Nestlé Nutrition Institute

Karger

Annales Nestlé Vol. 77, No 2, 2019

Annals of Nutrition & Metabolism Vol. 75, Suppl. 1, 2019
