# Supplementary material
Source: publisher figshare collection journal article supplement (https://karger.figshare.com/articles/dataset/_/12588188)
Supplement: Supplementary file 2 [file 2]

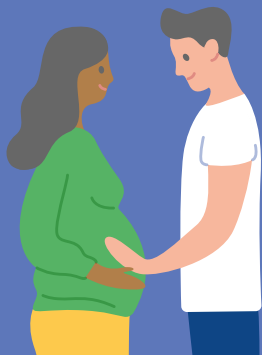

# UN CEREBRO JOVEN UN GRAN APETITO

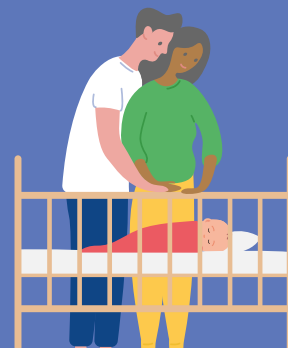

El cerebro es el órgano con mayor tiempo de desarrollo y maduración: comienza en la tercera semana de embarazo y continúa durante toda la edad adulta.

## Sueño

El sueño desempeña un papel importante en el desarrollo cognitivo y psicosocial saludable durante la transición de la infancia a la niñez

El sueño se compone de tres fases:

Sueño sin movimientos oculares rápidos (No REM): un sueño tranquilo y restaurador con baja actividad cerebral

Sueño con movimiento ocular rápido (REM): consolidación de recuerdos, sueños y construcción de conexiones en el sistema nervioso central

Vigilia

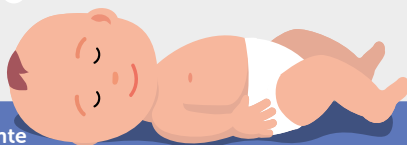

Factores importantes para el sueño del lactante

De 0 a 3 meses

De 2 a 3 meses

De 4 a 12 meses

De 12 a 18 meses

De 18 meses a 4 años

Es común que se cambien el día y la noche, no hay ritmo circadiano

Períodos regulares de somnolencia y estado de alerta

Más nocturno

Dos siestas al día

Una siesta diurna o ninguna

Factores importantes para el sueño del lactante

- ✓ Irse a la cama de manera regular y siempre a la misma hora
- ✓ Un lugar cómodo y seguro para dormir
- ✓ Ponerlo en la cuna somnoliento pero despierto
- ✓ Tiempo de uso de pantallas limitado
- ✓ Actividad adecuada y exposición a la luz del día

Beneficios de dormir bien:

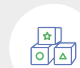

Aprendizaje y memoria

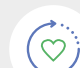

Regulación emocional

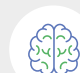

Desarrollo cognitivo

## Nutrición

La nutrición óptima en el período fetal y los primeros años de vida es fundamental para el desarrollo de la arquitectura cerebral sana necesaria para la cognición a lo largo de toda la vida

El hierro es actualmente el nutriente por excelencia cuando hablamos de:

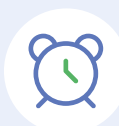

Tiempo

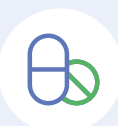

Dosis

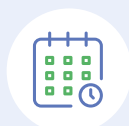

Duración de una deficiencia

Cuando un feto tiene deficiencia de hierro durante largos periodos de tiempo, el desarrollo cerebral no sigue la trayectoria habitual

Seis nutrientes comúnmente asociados con el desarrollo cognitivo temprano

Estos nutrientes son importantes desde antes de la concepción, durante el embarazo y después del parto:

Antes de la concepción Gestación Postnatal

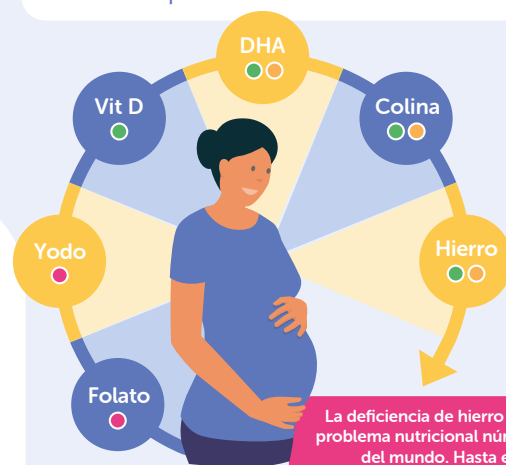

La deficiencia de hierro es el problema nutricional número 1 del mundo. Hasta el

**50%**

de las mujeres de todo el mundo presentan deficiencias

## Energía

El cerebro consume una alta proporción de la energía del cuerpo, especialmente en tiempos de rápido crecimiento

El cerebro infantil en desarrollo utiliza hasta el 60 % de las necesidades energéticas del cuerpo

Volumen cerebral del lactante respecto al de un adulto:

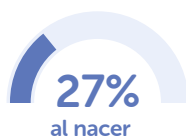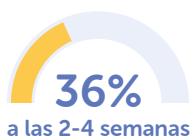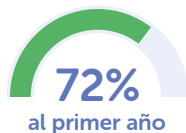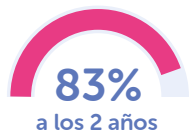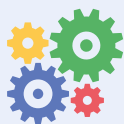

El cerebro adulto utiliza glucosa como energía

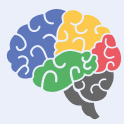

Un cerebro en fase de desarrollo necesita glucosa y ácidos grasos para producir energía

**NNI** Nestlé Nutrition Institute

**Karger**

Annales Nestlé  
Vol. 77, No 2, 2019

Annals of Nutrition & Metabolism  
Vol. 75, Suppl. 1, 2019
