# Supplementary material
Source: publisher figshare collection journal article supplement (https://karger.figshare.com/articles/dataset/_/12588188)
Supplement: Supplementary file 3 [file 2]

# 宝宝大脑发育 需求丰富多样

在所有器官中，大脑的发育和成熟所需的时间最长——  
从孕期的第三周开始，一直持续至成年

## 睡眠

在从婴儿成长为儿童的过程中，  
睡眠对健康的认知和心理社会发展起着重要作用

### 睡眠包含三种状态：

非快速眼动睡眠 (NREM) -  
安稳的恢复性睡眠，  
大脑活动水平较低

快速眼动睡眠 (REM) -  
巩固记忆、  
做梦和在中枢神经系统  
中建立联系

觉醒

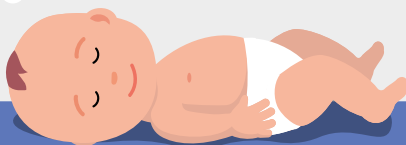

### 婴儿睡眠的重要因素

0-3 个月

日夜颠倒很常见，  
无昼夜节律

2-3 个月

规律的困倦期  
和警觉期

4-12 个月

更偏向夜  
间睡眠

12-18 个月

一天两次小睡

18 个月 - 4 岁

白天小睡一  
次或无小睡

### 影响婴儿睡眠的重要因素

- ✓ 规律一致的入睡时间
- ✓ 安全舒适的睡眠场所
- ✓ 在婴儿昏昏欲睡但是醒着的情况下将其放在婴儿床上
- ✓ 限制看电子屏幕的时间
- ✓ 适当的活动和日光照射

### 优质睡眠的益处：

- 学习与记忆
- 情绪调节
- 认知发展

## 营养

在胎儿时期和出生后的最初几年中保持最佳的营养状态对于健康的大脑结构发育至关重要，而健康的大脑结构对于终身认知能力的培养而言必不可少

目前，  
铁是有关以下问题讨论的典型营养元素：

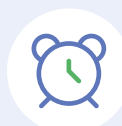

时机

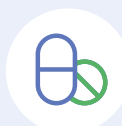

剂量

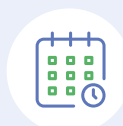

营养素缺乏所持续的时间

如果胎儿长时间缺铁，  
那么大脑的发育将不会按照典型的轨迹进行

与早期认知发育相关的  
六种常见营养元素

从怀孕前到孕期和分娩后，  
这些营养元素都非常重要：

● 怀孕前 ● 妊娠期 ● 产后

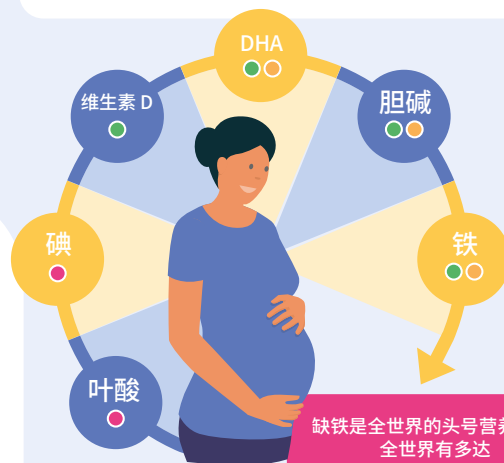

缺铁是全球的头号营养问题，  
全世界有多达

**50%**  
的妇女缺铁

## 能量

大脑消耗了大量的身体能量，  
尤其是在快速成长的时期

发育中的儿童大脑耗能占近60%  
的身体能量需求

### 婴儿期脑容量占成人期脑容量的比例：

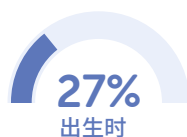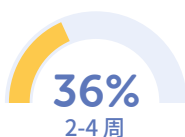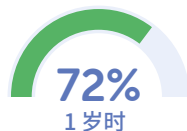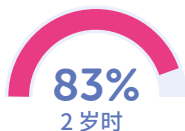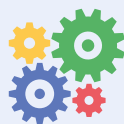

成人大脑将葡萄糖  
作为能量来源

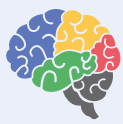

发育中的大脑需要葡萄糖和脂肪酸来产生能量

**NMI** Nestlé  
Nutrition  
Institute

**Karger**

Annales Nestlé  
Vol. 77, No 2, 2019

Annals of Nutrition & Metabolism  
Vol. 75, Suppl. 1, 2019
