# Supplementary material
Source: publisher figshare collection journal article supplement (https://karger.figshare.com/articles/dataset/_/12588188)
Supplement: Supplementary file 4 [file 2]

# CÉREBRO JOVEM

## ALTA DEMANDA

O cérebro é o órgão com maior tempo de desenvolvimento e maturação: começa na terceira semana de gravidez e continua durante toda a idade adulta

### Sono

O sono desempenha um papel importante no desenvolvimento cognitivo e psicossocial saudável durante a transição do período de amamentação à infância.

O sono é composto por três estados:

Movimento não rápido dos olhos (NREM) - repouso e restaurador, com baixa atividade cerebral

Movimento rápido dos olhos (REM) - consolidação de memórias, sonhos e construção de conexões no sistema nervoso central

Vigília

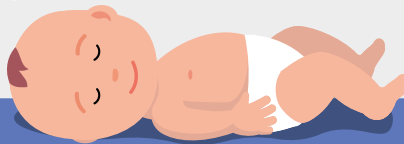

#### Horário de sono

0-3 meses

Trocar o dia pela noite é comum, sem ritmo circadiano

2-3 meses

Períodos regulares de sonolência e estado de alerta

4-12 meses

Mais noturno

12-18 meses

Dois cochilos por dia

18 meses - 4 anos

Um ou nenhum cochilo diurno

#### Fatores importantes para o sono infantil

- ✓ Rotina e horário regular para dormir
- ✓ Lugar seguro e confortável para dormir
- ✓ Ser colocado no berço sonolento, mas acordado
- ✓ Tempo de tela limitado
- ✓ Atividade apropriada e exposição à luz do dia

#### Benefícios do sono:

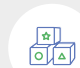

Aprendizagem e memória

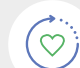

Regulação emocional

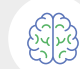

Desenvolvimento cognitivo

### Nutrição

A nutrição ideal no período fetal e nos primeiros anos de vida é fundamental para o desenvolvimento de uma estrutura cerebral saudável, necessária para a cognição ao longo da vida

O ferro é atualmente o nutriente em discussão de:

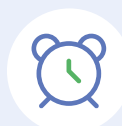

Horários

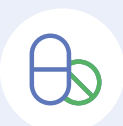

Dose

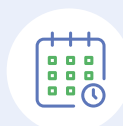

Duração de uma deficiência

Quando um feto tem deficiência em ferro por longos períodos de tempo, o desenvolvimento cerebral não prossegue em uma trajetória típica

Seis nutrientes comumente associados ao desenvolvimento cognitivo precoce

Esses nutrientes são importantes desde a pré-concepção até a gravidez e após o nascimento:

● Pré-concepção ● Gestação ● Pós-natal

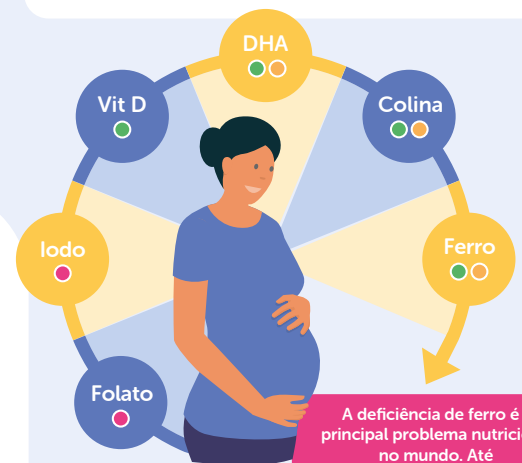

A deficiência de ferro é o principal problema nutricional no mundo. Até **50%** das mulheres em todo o mundo apresentam deficiência

### Energia

O cérebro consome uma grande parte da energia do corpo, especialmente durante tempos de rápido crescimento

O cérebro em desenvolvimento, na infância, utiliza até 60% das necessidades de energia do corpo

Volume do cérebro de uma criança comparado ao de um adulto:

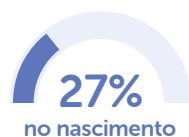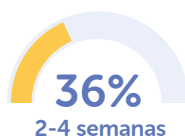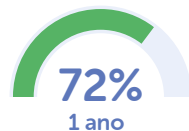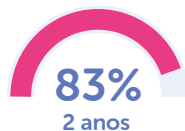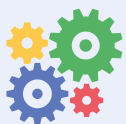

O cérebro adulto usa glicose para obter energia

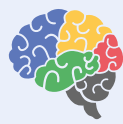

O cérebro em desenvolvimento precisa de glicose e ácidos graxos para produzir energia

**NNI** Nestlé Nutrition Institute

Annales Nestlé  
Vol. 77, No 2, 2019

**Karger**

Annals of Nutrition & Metabolism  
Vol. 75, Suppl. 1, 2019
