# Supplementary material
Source: publisher figshare collection journal article supplement (https://karger.figshare.com/articles/dataset/_/12588188)
Supplement: Supplementary file 5 [file 2]

# JEUNE CERVEAU GRAND APPÉTIT

Le cerveau est l'organe connaissant le développement et la maturation les plus longs. Cela commence à partir de la troisième semaine de grossesse et se poursuit tout au long de l'âge adulte

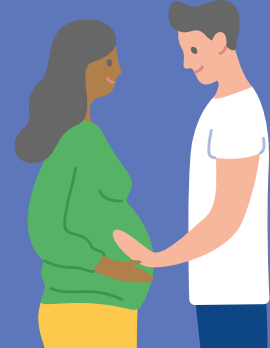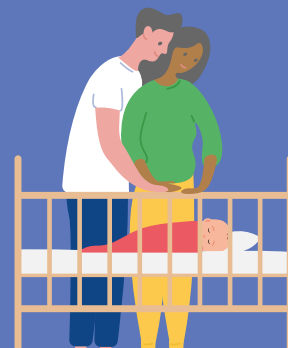

## Sommeil

Le sommeil est composé de trois phases :

Sommeil à ondes lentes (NREM) - phase reposante et réparatrice avec faible activité cérébrale

Sommeil paradoxal (REM) - consolidation des souvenirs, rêves et établissement de connexions dans le système nerveux central

Éveil

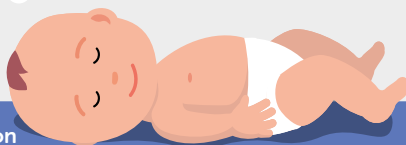

Aspects importants du sommeil du nourrisson

0-3 mois

Inversion diurne/nocturne fréquente, pas de rythme circadien

2-3 mois

Périodes régulières de sommeil et d'alerte

4-12 mois

Plus nocturne

12-18 mois

Deux siestes par jour

18 mois - 4 ans

Une, voire aucune sieste par jour

Aspects importants du sommeil du nourrisson

- ✓ Heure du coucher régulière et constante
- ✓ Endroit rassurant et confortable pour dormir
- ✓ Le coucher dans un état somnolent mais éveillé
- ✓ Temps réduit devant les écrans
- ✓ Activité adaptée et exposition à la lumière du jour

Bienfaits du sommeil :

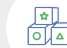

Apprentissage et mémoire

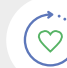

Régulation des émotions

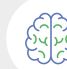

Développement cognitif

## Alimentation

Une alimentation optimale pendant la période fœtale et les premières années de la vie est essentielle au développement d'une bonne architecture cérébrale

Le fer est le nutriment typique pris en compte dans ces aspects :

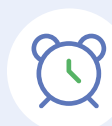

Durée

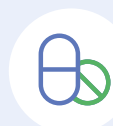

Dose

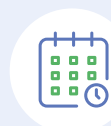

Durée d'une carence

Lorsqu'un fœtus présente une carence en fer pendant une longue durée, le développement du cerveau ne suit pas une évolution classique

Six nutriments communément associés au développement cognitif précoce

Ces nutriments sont importants, de la pré-conception à la grossesse, et après l'accouchement :

● Pré-conception ● Gestation ● après la naissance

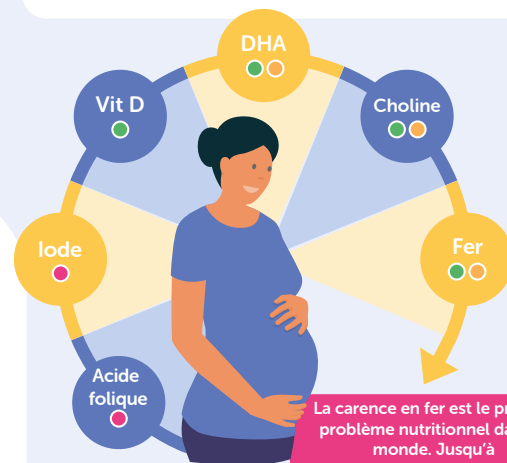

La carence en fer est le premier problème nutritionnel dans le monde. Jusqu'à

**50%**

des femmes dans le monde souffrent de cette carence

## Énergie

Le cerveau consomme une grande partie de l'énergie du corps, surtout en période de croissance rapide

Le cerveau de l'enfant en pleine croissance utilise jusqu'à 60 % des besoins énergétiques de l'organisme

Volume du cerveau d'un nourrisson par rapport à celui d'un adulte :

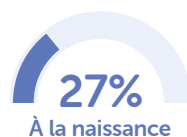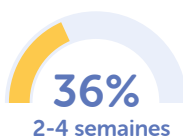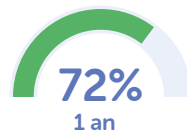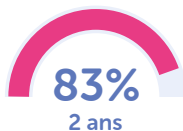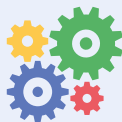

Le cerveau adulte utilise le glucose comme source d'énergie

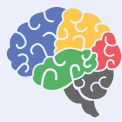

Le cerveau en développement a besoin de glucose et d'acides gras (DHA, ARA) pour produire de l'énergie

**NNI** Nestlé Nutrition Institute

**Karger**

Annales Nestlé  
Vol. 77, No 2, 2019

Annals of Nutrition & Metabolism  
Vol. 75, Suppl. 1, 2019
