# Supplementary material
Source: publisher figshare collection journal article supplement (https://karger.figshare.com/articles/dataset/_/12588188)
Supplement: Supplementary file 6 [file 2]

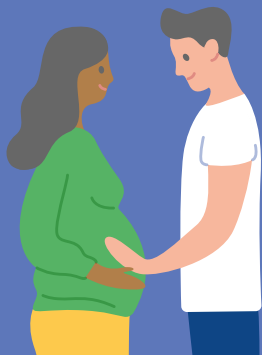

# CO POTŘEBUJE DĚTSKÝ MOZEK

Mozek je orgán, který se nejdéle vyvíjí a dozrává. Vývoj začíná ve třetím týdnu těhotenství a pokračuje i v dospělosti.

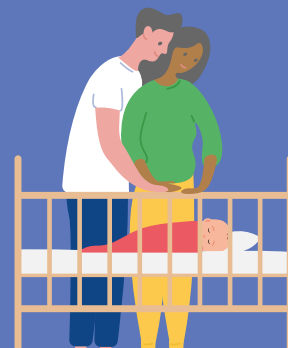

## Spánek

Spánek hraje důležitou úlohu ve zdravém kognitivním a psychosociálním vývoji během přechodu od nejútlejšího věku do dětství

Spánek se skládá ze tří fází:

NREM fáze  
(bez rychlého pohybu očí)  
– klidný a regenerující  
spánek

REM fáze  
(rychlé pohyby očí) –  
konsolidace vzpomínek,  
 sny a vytváření spojení v  
centrálním nervovém  
systému

Bdělost

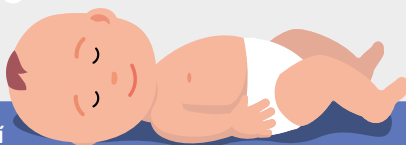

Důležité faktory pro spánek malých dětí

0-3 měsíce

běžné zaměňování  
dne/noci, chybí  
cirkadiánní rytmus

2-3 měsíce

pravidelné intervaly  
spánku a bdělosti

4-12 měsíců

více spánku  
v noci

12-18 měsíců

přes den spí  
dvakrát

18 měsíců - 4 roky

přes den spí  
jednou nebo vůbec

Důležité faktory pro spánek malých dětí

- ✓ Pravidelný a konzistentní čas, kdy jde dítě spát
- ✓ Bezpečné a pohodlné místo ke spaní
- ✓ Dítě dáváte do postýlky ospalé, ale stále vzhůru
- ✓ Omezený čas u obrazovky
- ✓ Dostatečná fyzická aktivita a denní světlo

Výhody dobrého spánku:

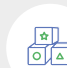

Učení a paměť

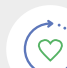

Emoční samoregulace

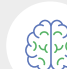

Kognitivní vývoj

## Výživa

Optimální výživa v prenatálním období a prvních letech života dítěte je klíčová pro vývoj zdravé architektury mozku, potřebné pro kognitivní funkce po celý život.

Železo je v současné době důležitou  
živinou pro diskusi s ohledem na:

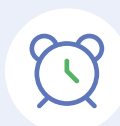

Načasování

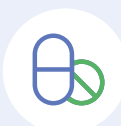

Množství

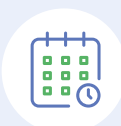

Délka trvání  
nedostatku

Nemá-li plod po delší období dostatek  
železa, vývoj mozku nenásleduje typickou  
trajektorii.

Šest živin běžně spojovaných  
s kognitivním vývojem v raném věku

Tyto živiny jsou důležité pro období před početím,  
během těhotenství a po narození dítěte:

● Před početím ● Těhotenství ● Po narození

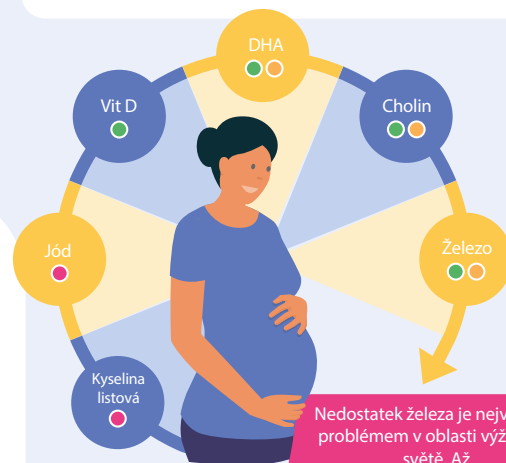

Nedostatek železa je největším  
problémem v oblasti výživy na  
světě. Až

**50%**

žen po celém světě trpí  
nedostatkem železa.

## Energie

Mozek spotřebovává velkou část  
energie našeho těla, zejména v  
obdobích rychlého růstu

Objem mozku malého dítěte v  
porovnání s mozkem dospělého:

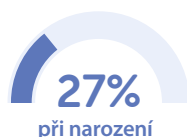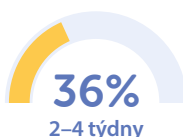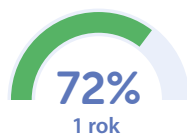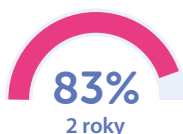

Vyvíjející se dětský mozek spotřebovává  
až 60 % energetické potřeby těla.

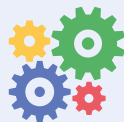

Dospělý mozek  
využívá jako  
energii glukózu.

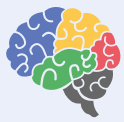

Vyvíjející se mozek potřebuje k  
produkci energie glukózu a  
mastné kyseliny.

**NNI** Nestlé  
Nutrition  
Institute

Annales Nestlé  
Vol. 77, No 2, 2019

**Karger**

Annals of Nutrition & Metabolism  
Vol. 75, Suppl. 1, 2019
