# Supplementary material
Source: publisher figshare collection journal article supplement (https://karger.figshare.com/articles/dataset/_/12588188)
Supplement: Supplementary file 7 [file 2]

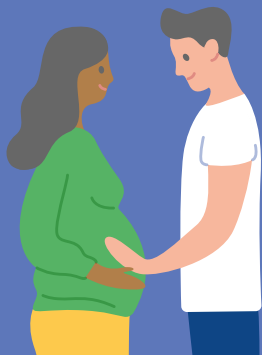

# GROßER ENERGIEBEDARF FÜR DAS GEHIRNWACHSTUM

Das Gehirn ist das Organ mit der längsten Entwicklungs- und Reifezeit – sie beginnt in der dritten Schwangerschaftswoche und setzt sich bis ins Erwachsenenalter fort

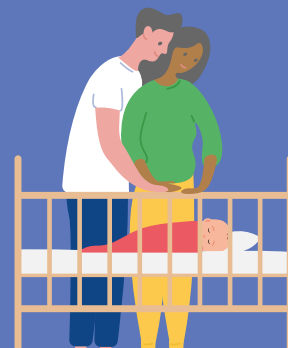

## Schlaf

Der Schlaf spielt eine wichtige Rolle für eine gesunde kognitive und psychosoziale Entwicklung während des Übergangs vom Säuglings- ins Kindesalter.

Es gibt drei Schlafphasen:

Keine schnellen Augenbewegungen (Non-REM-Schlaf) – erholsam und regenerierend bei geringer Hirnaktivität

Schnelle Augenbewegungen (REM-Schlaf) – Konsolidierung von Erinnerungen, Träumen und Aufbau von Verbindungen im zentralen Nervensystem

Wachphase

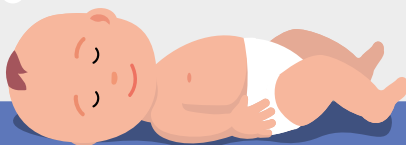

Wichtige Faktoren für den Säuglingsschlaf

- ✓ Regelmäßige und gleichbleibende Schlafenszeit
- ✓ Sicherer und bequemer Schlafplatz
- ✓ Schläfrig, aber wach ins Bett gelegt zu werden
- ✓ diesen Punkt streichen
- ✓ Angemessene Beschäftigung & Aktivität
- ✓ Tageslichtexposition

Entwicklung des Säuglingsschlafs

0-3 Monate

kein zirkadianer Rhythmus ist weit verbreitet, kein zirkadianer Rhythmus

2-3 Monate

kein ausgeprägter Nacht/Tag Rhythmus

4-12 Monate

Zunahme des Nachtschlafs

12-18 Monate

zwei Nickerchen pro Tag

18 Monate - 4 Jahre

eine oder ca. ein Nickerchen pro Tag

Guter Schlaf fördert:

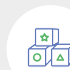

Lernfähigkeit und Gedächtnisleistung

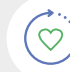

Emotionen

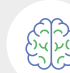

Kognitive Entwicklung

## Ernährung

Eine optimale Ernährung in der Fetalphase und in den ersten Lebensjahren ist von zentraler Bedeutung für die Entwicklung einer gesunden Hirnarchitektur, die für lebenslange kognitive Leistungsfähigkeit unverzichtbar ist.

Diskussionspunkte im Zusammenhang mit dem Nährstoff Eisen sind derzeit:

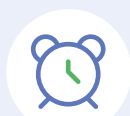

Zeitpunkt

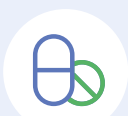

Dosis

Wenn ein Fötus über längere Zeiträume hinweg einen Eisenmangel aufweist, vollzieht sich die Gehirnentwicklung nicht entlang der typischen Verlaufskurve

Sechs Nährstoffe werden im Allgemeinen mit frühkognitiver Entwicklung in Verbindung gebracht

Diese Nährstoffe sind sowohl vor der Empfängnis, während der Schwangerschaft als auch nach der Geburt wichtig:

● Vor der Empfängnis ● Schwangerschaft ● Nach der Geburt

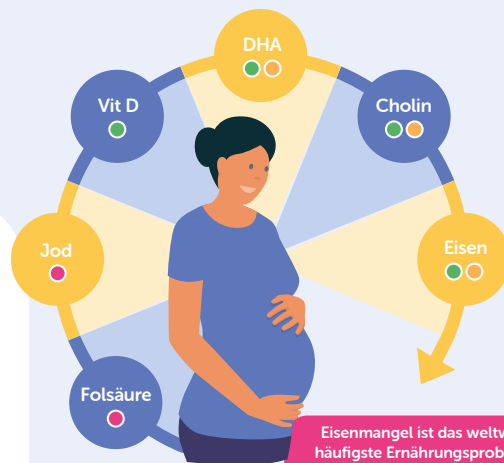

Eisenmangel ist das weltweit häufigste Ernährungsproblem. Bis zu

**50%**

der weiblichen Weltbevölkerung leidet an Eisenmangel

## Energie

Das Gehirn verbraucht einen hohen Anteil der körpereigenen Energie, besonders in Zeiten schnellen Wachstums.

Das sich entwickelnde Gehirn im Kindesalter verbraucht bis zu 60% des Gesamtenergiebedarfs.

Diskussionspunkte im Zusammenhang mit der Eisenversorgung:

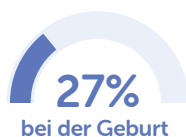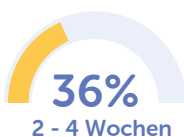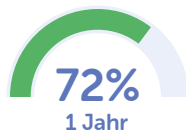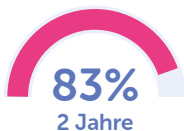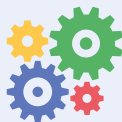

Das Gehirn eines Erwachsenen verwertet Glukose zur Energiegewinnung

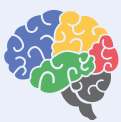

Das sich entwickelnde Gehirn benötigt Glukose und Fettsäuren zur Energiegewinnung

**NMI** Nestlé Nutrition Institute

Annales Nestlé  
Vol. 77, No 2, 2019

**Karger**

Annals of Nutrition & Metabolism  
Vol. 75, Suppl. 1, 2019
