# Supplementary material
Source: publisher figshare collection journal article supplement (https://karger.figshare.com/articles/dataset/_/12588188)
Supplement: Supplementary file 8 [file 2]

# МОЛОДОЙ МОЗГ ХОРОШИЙ АППЕТИТ

У головного мозга самый долгий период развития и созревания по сравнению с другими органами. Этот процесс начинается с третьей недели беременности и продолжается в течение всей взрослой жизни

## Сон

Сон играет важную роль в полноценном когнитивном и психосоциальном развитии в процессе перехода из младенчества в детство

Сон состоит из трех стадий:

Медленный сон (NREM) — покойная, восстановительная фаза с низкой активностью мозга

Быстрый сон (REM) — запоминание необходимых сведений, сновидения и построение связей в центральной нервной системе

Пробуждение

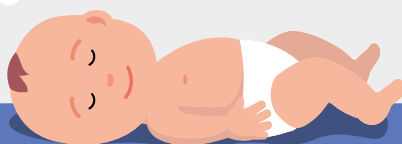

Важные факторы сна младенцев

0-3 месяца

Часто не различают день и ночь, отсутствует суточный биоритм

2-3 месяца

Устанавливаются регулярные циклы сна и активности

4-12 месяцев

Преобладает ночной сон

12-18 месяцев

Два коротких сна в день

18 месяцев - 4 года

Один короткий дневной сон или отсутствие дневного сна

Важные факторы сна младенцев

- ✓ Одно и то же время отхода ко сну
- ✓ Безопасное и удобное место для сна
- ✓ Переключивание в детскую кроватку, когда ребенок сонный, но еще не спит
- ✓ Ограничение времени, проводимого у экрана телевизора/монитора компьютера
- ✓ Соответствующая возрасту физическая активность и воздействие дневного света

Преимущества хорошего сна:

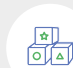

Обучаемость и память

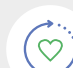

Контроль эмоций

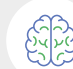

Когнитивное развитие

## Питание

Для полноценного развития структуры головного мозга, необходимой для осуществления когнитивной деятельности в течение всей жизни, очень важно получать оптимальное питание во внутриутробный период и в первые несколько лет жизни

В настоящее время железо — это основное питательное вещество при обсуждении:

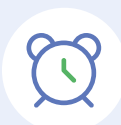

сроков

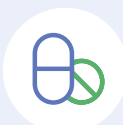

дозы

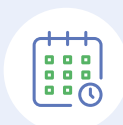

периода дефицита

Если в течение длительного времени плод испытывает дефицит железа, мозг развивается нетипично

Шесть питательных веществ, как правило, связываемых с ранним когнитивным развитием

Эти питательные вещества важны в период перед зачатием, во время беременности и после рождения:

Период перед зачатием Период беременности Послеродовой период

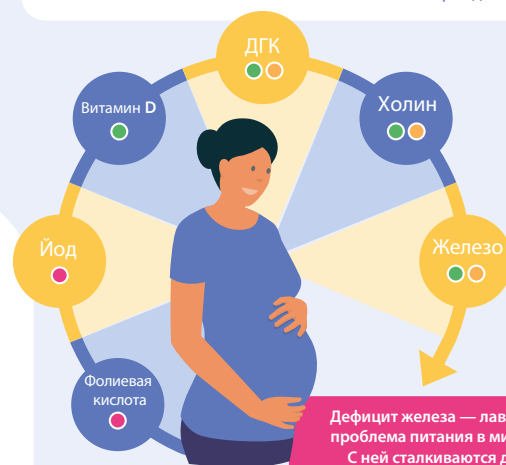

Дефицит железа — лавная проблема питания в мире. С ней сталкиваются до

**50%**

женщин во всем мире

## Энергия

Головной мозг поглощает большое количество вырабатываемой организмом энергии, особенно в период быстрого роста

Развивающийся детский мозг использует до 60 % энергии организма

Объем мозга младенца и взрослого:

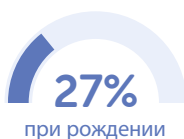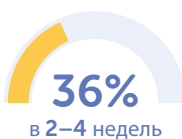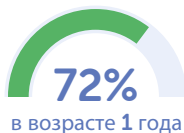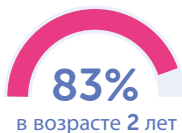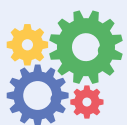

Головной мозг взрослого человека использует глюкозу в качестве источника энергии

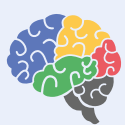

Развивающемуся мозгу для выработки энергии нужны глюкоза и жирные кислоты

**NNI** Nestlé Nutrition Institute

Annales Nestlé  
Vol. 77, No 2, 2019

**Karger**

Annals of Nutrition & Metabolism  
Vol. 75, Suppl. 1, 2019
