# Supplementary material
Source: publisher figshare collection journal article supplement (https://karger.figshare.com/articles/dataset/_/12588188)
Supplement: Supplementary file 9 [file 2]

# GENÇ BEYİN BÜYÜK İŞTAH

Beyin, en uzun gelişim ve olgunlaşma süresine sahip olan organdır. Gelişimi gebeliğin üçüncü haftasında başlar ve yetişkinlik boyunca devam eder

## Uyku

Uyku, bebeklikten çocukluğa geçişte sağlıklı bilişsel ve psikososyal gelişimde önemli bir rol oynar

### Uyku üç evreden oluşur:

Hızlı olmayan göz hareketi (NREM) - düşük beyin aktivitesi ile dinlendirici ve güçlendiricidir

Hızlı göz hareketi (REM) - anıları pekiştirme, rüya görme ve merkezi sinir sisteminde bağlantılar kurmayı içerir

Uyanıklık

### Bebeklerin uykusu açısından önemli faktörler

- ✓ Düzenli ve tutarlı uyku zamanı
- ✓ Uyumak için güvenli ve konforlu bir yer
- ✓ Bebek karyolasına uykulu ama uyanık bir halde konma
- ✓ Sınırlı ekran süresi
- ✓ Uygun etkinlik ve güneş ışığı alımı

### İyi uykunun faydaları:

- Öğrenme ve hafıza
- Duygusal regülasyon
- Bilişsel gelişim

### Bebeklerin uykusu açısından önemli faktörler

0-3 ay

2-3 ay

4-12 ay

12-18 ay

18 ay - 4 yıl

gece ve gündüzün tersine dönmesi yaygındır, sirkadiyen ritim yoktur

Düzenli uyku ve uyanıklık dönemleri

Daha fazla gece uykusu

günde iki şekerleme

günde bir şekerleme veya şekerleme yok

## Beslenme

Fetüs döneminde ve yaşamın ilk birkaç yılında ideal beslenme, yaşam boyu bilişsellik için gerekli olan sağlıklı bir beyin mimarisinin geliştirilmesinde önemli rol oynar

Demir, aşağıdakiler açısından ele alınması gereken önemli bir besindir:

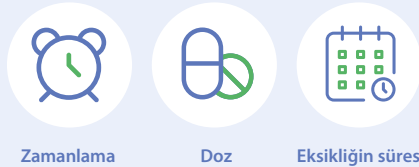

Bir fetüs uzun süreler demir eksikliği yaşarsa beyin gelişimi tipik bir seyir izlemez

Erken bilişsel gelişimle yaygın olarak ilişkili altı besin

Bu besinler, gebelik öncesi ile gebelik döneminin yanı sıra doğum sonrasında da önemlidir:

● Gebelik öncesi ● Gebelik ● Doğum sonrası

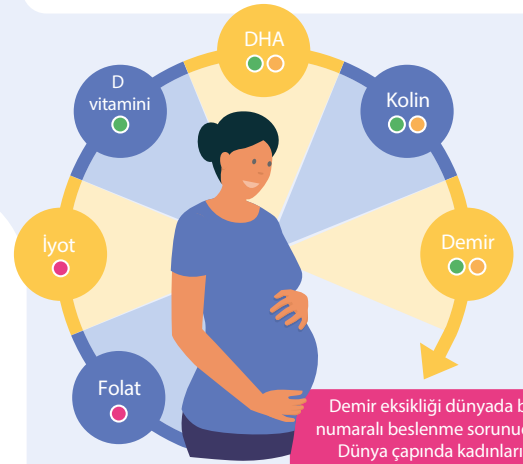

Demir eksikliği dünyada bir numaralı beslenme sorunudur. Dünya çapında kadınların

**50%**  
kadarında demir eksikliği bulunmaktadır

## Enerji

Beyin, özellikle hızlı büyüme dönemlerinde vücudun enerjisinin büyük bir kısmını tüketir

Gelişmekte olan çocuk beyni, vücudun enerjisinin %60 kadarını kullanır

Bir yetişkininkine kıyasla bebek beyninin hacmi:

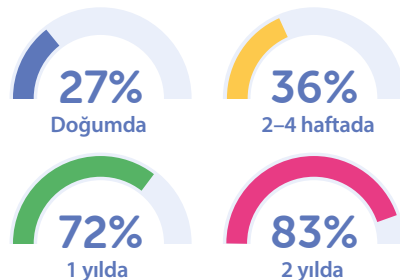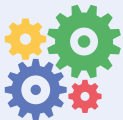

Yetişkin beyni, enerji için glikoz kullanır

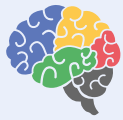

Gelişmekte olan beynin enerji üretmek için glikoza ve yağ asitlerine ihtiyacı vardır

**NNI** Nestlé Nutrition Institute

**Karger**

Annales Nestlé  
Vol. 77, No 2, 2019

Annals of Nutrition & Metabolism  
Vol. 75, Suppl. 1, 2019
