# Supplementary material
Source: publisher figshare collection journal article supplement (https://karger.figshare.com/articles/dataset/_/12588188)
Supplement: Supplementary file 10 [file 2]

# YOUNG BRAIN BIG APPETITE

The brain is the organ with the longest development and maturation time - it starts in the third week of pregnancy and continues throughout adulthood

## Sleep

Sleep plays an important role in healthy cognitive & psychosocial development during the transition from infancy to childhood.

Sleep is made up of three states:

Non-rapid eye movement (NREM) - restful and restorative with low brain activity

Rapid eye movement (REM) - consolidating memories, dreaming and building connections in central nervous system

Wakefulness

Important factors for infant sleep

- ✓ Regular and consistent bedtime
- ✓ Safe and comfortable place to sleep
- ✓ Being put in cot drowsy but awake
- ✓ Limited screen time
- ✓ Appropriate activity & exposure to daylight

## Sleep timelines

| 0-3 months                                        | 2-3 months                                | 4-12 months    | 12-18 months   | 18 months - 4 years   |
|---------------------------------------------------|-------------------------------------------|----------------|----------------|-----------------------|
| day/night reversal is common, no circadian rhythm | regular periods of sleepiness & alertness | more nocturnal | two naps a day | one or no daytime nap |

Good sleep benefits:

- Learning & memory
- Emotional regulation
- Cognitive development

## Nutrition

Optimal nutrition in the fetal period and first few years of life is central to the development of a healthy brain architecture needed for lifelong cognition

Iron is currently the quintessential nutrient for the discussion of:

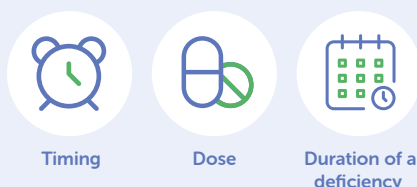

When a fetus is iron deficient for extended periods of time, brain development does not proceed on a typical trajectory

Six nutrients commonly associated with early cognitive development

These nutrients are important from pre-conception to pregnancy and after birth:

● Pre-conception    ● Gestation    ● Post natal

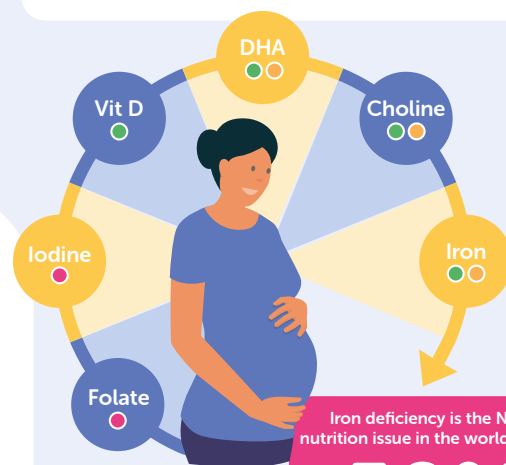

Iron deficiency is the No 1 nutrition issue in the world. Up to

**50%**  
of women worldwide are deficient

## Energy

The brain consumes a high proportion of the body's energy, especially during times of rapid growth

The developing childhood brain uses up to 60% of the body's energy requirements

Infant brain volume vs that of an adult:

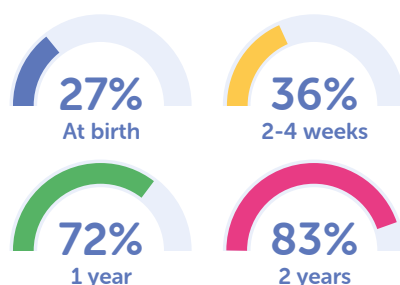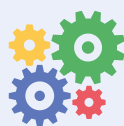

The adult brain uses glucose for energy

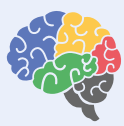

The developing brain needs glucose and fatty acids to produce energy

**NNI** Nestlé Nutrition Institute

**Karger**

Annales Nestlé  
Vol. 77, No 2, 2019

Annals of Nutrition & Metabolism  
Vol. 75, Suppl. 1, 2019
